# Supplementary material for: Quantitative analysis of intermolecular interactions in cocrystals and a pair of polymorphous cocrystal hydrates from 1,4-dihydroquinoxaline-2,3-dione and 1H-benzo[d]imidazol-2(3H)-one with 2,5-dihydroxy-1,4-benzoquinones: a combined X-ray structural and theoretical analysis
Source: Royal Society of Chemistry journal article supplement (doi:10.1039/d0ce01056a), 2020-01-01
Supplement: d0ce01056a1.pdf [file d0ce01056a1.pdf]

## Supporting information

### **Quantitative analysis of intermolecular interactions in cocrystals and a pair of polymorphous cocrystal hydrates from 1,4-dihydroquinoxaline-2,3-dione and 1*H*-benzo[*d*]imidazol-2(3*H*)-one with 2,5-dihydroxy-1,4-benzoquinones: A combined X-ray structure and theoretical analysis**

**Martha V. Sosa-Rivadeneira,<sup>a\*</sup> Perumal Venkatesan,<sup>b</sup> Fermin Flores-Manuel,<sup>a</sup> Sylvain Bernès,<sup>c</sup> Herbert Höpfl,<sup>d</sup> Margarita Cerón,<sup>b</sup> Subbiah Thamocharan<sup>e</sup> and M. Judith Percino<sup>b</sup>**

<sup>a</sup>Facultad de Ciencias Químicas, Benemérita Universidad Autónoma de Puebla (BUAP). 14 Sur Esquina San Claudio, San Manuel, 72570, Puebla, Mexico

<sup>b</sup>Unidad de Polímeros y Electrónica Orgánica, Instituto de Ciencias, Benemérita Universidad Autónoma de Puebla, Val3-Ecocampus Valsequillo, Independencia O2 Sur 50, San Pedro Zacachimalpa, C.P. 72960 Puebla, Mexico

<sup>c</sup>Instituto de Física, Benemérita Universidad Autónoma de Puebla (IFBUAP). Av. San Claudio y Blvd. 18 Sur, Col. San Manuel 72570, Puebla, Mexico

<sup>d</sup>Centro de Investigaciones Químicas, Instituto de Investigación en Ciencias Básicas y Aplicadas, Universidad Autónoma del Estado de Morelos, Av. Universidad 1001, Cuernavaca 62209, Morelos, Mexico.

<sup>e</sup>Biomolecular Crystallography Laboratory, Department of Bioinformatics, School of Chemical and Biotechnology, SASTRA Deemed University, 613 401, Thanjavur, India.

## Experimental procedures for the crystallization of compounds I, I<sub>A</sub>·2H<sub>2</sub>O, I<sub>B</sub>·2H<sub>2</sub>O, II and III

Screening experiments for cocrystal phases between the cyclic amides (DHQ or BIM) and the anilic acids (CA or AA) explored herein were realized using the slow solvent evaporation method. Initially, crystallization attempts were performed using a 1:1 stoichiometric ratio and the following solvents: acetone, MeOH, EtOH, CH<sub>3</sub>CN and H<sub>2</sub>O. However, in all cases where crystals suitable for single-crystal X-ray diffraction analysis were isolated, the amide-anilic acid proportion in the cocrystal was 2:1. Because of this, the crystallization experiments were then repeated using this ratio.

(DHQ)<sub>2</sub>CA (I): 1,4-Dihydroquinoxaline-2,3-dione (0.018 g, 0.111 mmol) and 2,5-dichloro-3,6-dihydroxy-*p*-benzoquinone (0.012 g, 0.055 mmol) were dissolved in 20 mL of acetonitrile. This mixture was heated until dissolution of the reactants, whereupon the solution was filtered and left for slow solvent evaporation at room temperature. After 3 days yellow crystals had formed, which were suitable for single-crystal X-ray diffraction analysis. Yield: 37%. IR (ATR):  $\tilde{\nu}$  = 3031, 2954, 2868, 1666, 1626, 1402, 1362, 1254, 984, 845, 752, 701, 645, 566, 468 cm<sup>-1</sup>.

(DHQ)<sub>2</sub>CA (I<sub>A</sub>·2H<sub>2</sub>O): 1,4-Dihydroquinoxaline-2,3-dione (0.018 g, 0.111 mmol) and 2,5-dichloro-3,6-dihydroxy-*p*-benzoquinone (0.012 g, 0.055 mmol) were dissolved in 20 mL water and the mixture was heated until complete dissolution of the reactants. After filtration, the solution was left for slow solvent evaporation at room temperature. After 10 days red crystals had formed, which were suitable for single-crystal X-ray diffraction analysis. Yield: 55%. IR (ATR):  $\tilde{\nu}$  = 3415, 3223, 3049, 2972, 2875, 1689, 1659, 1600, 1507, 1404, 1385, 1246, 1219, 1126, 1004, 938, 847, 797, 771, 746, 701, 667, 640, 582, 562, 467 cm<sup>-1</sup>.

(DHQ)<sub>2</sub>CA (I<sub>B</sub>·2H<sub>2</sub>O): 1,4-Dihydroquinoxaline-2,3-dione (0.018 g, 0.111 mmol) and 2,5-dichloro-3,6-dihydroxy-*p*-benzoquinone (0.012 g, 0.055 mmol) were dissolved in 20 mL of methanol (hydrated) and the resultant mixture was heated until complete dissolution of the reactants. After filtration, the solution was left for slow solvent evaporation at room

temperature. After 4 days reddish orange crystals had grown, which were suitable for single-crystal X-ray diffraction analysis. This product crystallized as a mixture of  $I_A \cdot 2H_2O$  and  $I_B \cdot 2H_2O$ , and only were recognized until their characterization by single-crystal X-ray diffraction.

(BIM)<sub>2</sub>CA (II): 1*H*-benzo[*d*]imidazol-2(3*H*)-one (0.018 g, 0.134 mmol) and 2,5-dichloro-3,6-dihydroxy-*p*-benzoquinone (0.014 g, 0.067 mmol) were dissolved in 20 mL of acetonitrile. The solution was heated until complete dissolution of the reactants and, after filtration, left for slow solvent evaporation at room temperature. After 5 days orange crystals had grown, which were suitable for single-crystal X-ray diffraction analysis. Yield: 55%. IR (ATR):  $\tilde{\nu}$  = 3230, 3023, 2901, 2809, 1736, 1666, 1631, 1483, 1360, 1268, 1197, 1026, 982, 855, 735, 702, 598, 571, 501 cm<sup>-1</sup>.

(BIM)<sub>2</sub>AA (III): 1*H*-benzo[*d*]imidazol-2(3*H*)-one (0.020 g, 0.149 mmol) and 2,5-dihydroxy-1,4-benzoquinone (0.010 g, 0.0745 mmol) were dissolved in 20 mL of acetonitrile. The reaction mixture was heated until complete dissolution of the reactants and, after filtration left for slow solvent evaporation at room temperature. After 5 days orange crystals had grown, which were suitable for single-crystal X-ray diffraction analysis. Yield: 57%. IR (ATR):  $\tilde{\nu}$  = 3138, 3027, 2901, 2801, 1704, 1651, 1622, 1481, 1381, 1305, 1270, 1208, 1027, 871, 824, 759, 734, 701, 667, 596, 501 cm<sup>-1</sup>.

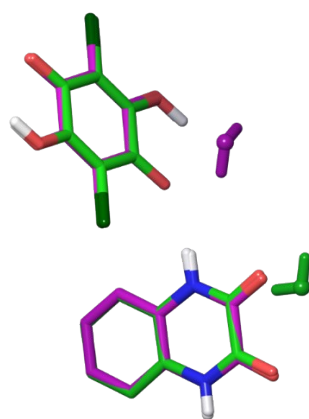

**Figure S1.** Structure overlay of the molecular components in **I**,  $I_A \cdot 2H_2O$  and  $I_B \cdot 2H_2O$ . For the structure overlay, atoms N1, C1, N2, C2, C9, C10, C9\_a, C10\_a were used. Color codes: C atoms and water molecule are green for  $I_A \cdot 2H_2O$  and purple for  $I_B \cdot 2H_2O$ .

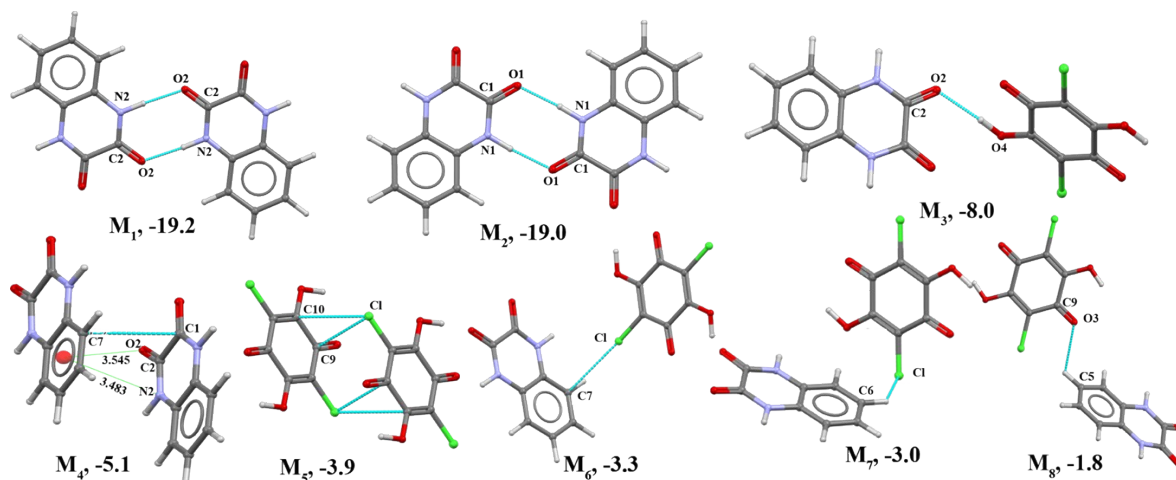

**Figure S2.** Homo- and heterodimeric motifs formed through hydrogen bonding and  $\pi\cdots\pi$  contacts in the crystal structure of **I**. Dashed lines indicate the intermolecular interactions and the dimers are labeled along with the interaction energy obtained by DFT calculations ( $E_{\text{tot}}$  in kcal mol<sup>-1</sup>, refer Table 2 in main manuscript).

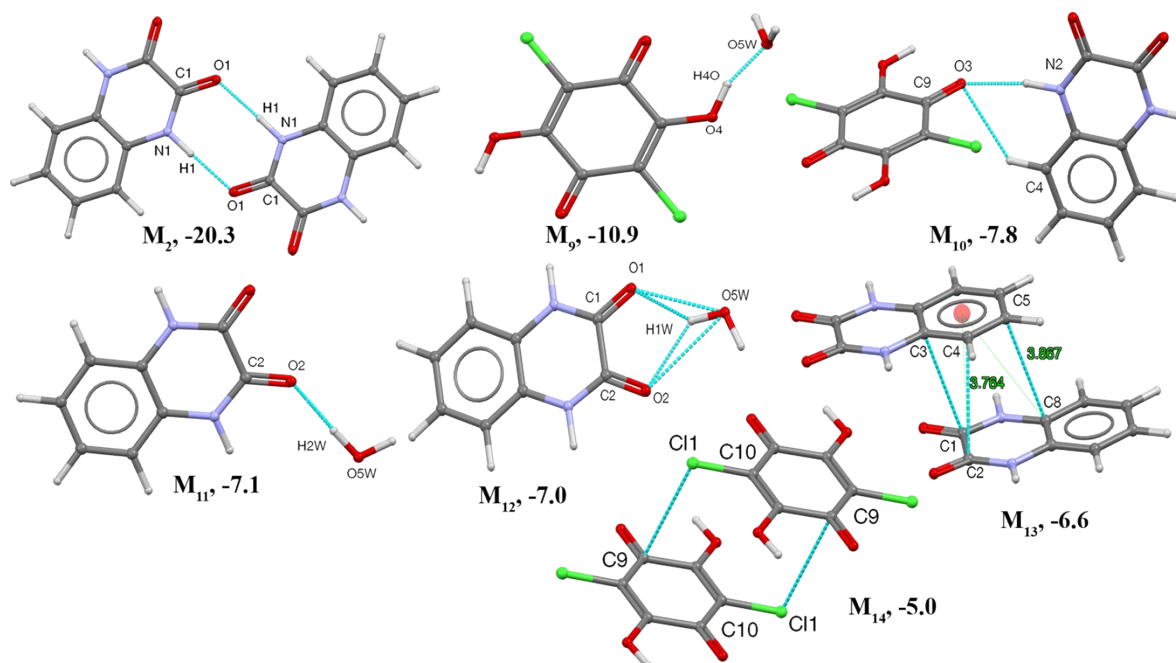

**Figure S3.** Homo- and heterodimeric motifs formed through hydrogen bonding and  $\pi\cdots\pi$  contacts in the crystal structure of **I<sub>A</sub>·2H<sub>2</sub>O**. Dashed lines indicate the intermolecular interactions and the dimers are labeled along with the interaction energy obtained by DFT calculations ( $E_{\text{tot}}$  in kcal mol<sup>-1</sup>, refer Table 2 in main manuscript).

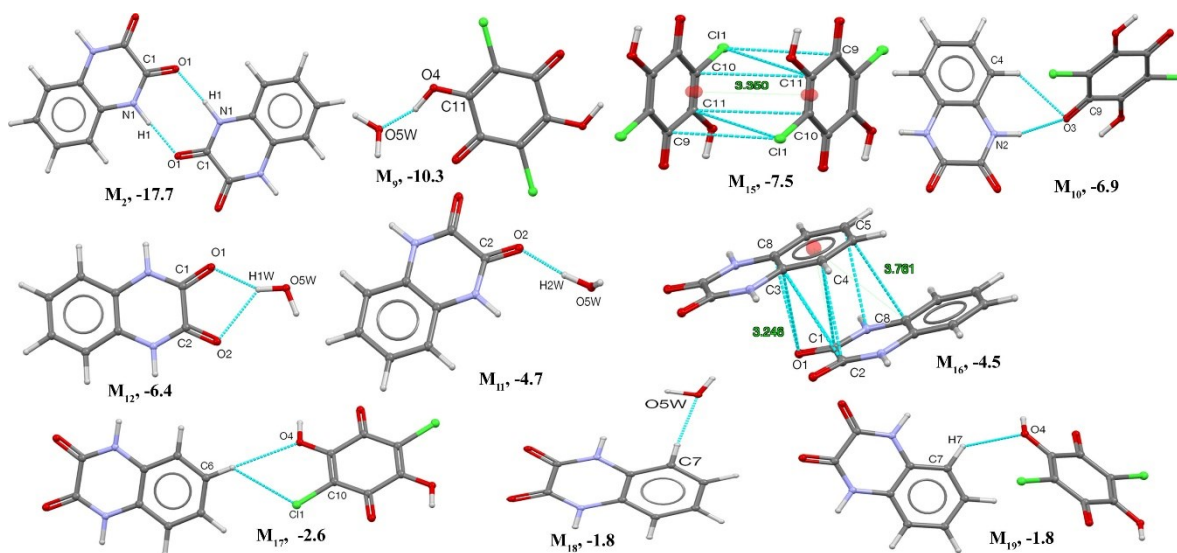

**Figure S4.** Homo- and heterodimeric motifs formed through hydrogen bonding and  $\pi\cdots\pi$  contacts in the crystal structure of  $I_B \cdot 2H_2O$ . Dashed lines indicate the intermolecular interactions and the dimers are labeled along with the interaction energy obtained by DFT calculations ( $E_{tot}$  in kcal mol<sup>-1</sup>, refer Table 2 in main manuscript).

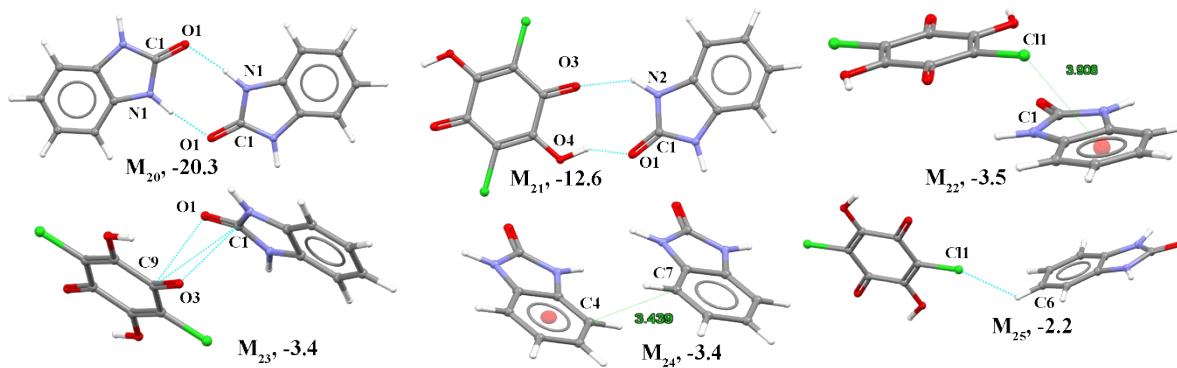

**Figure S5.** Homo- and heterodimeric motifs formed through hydrogen bonding and  $\pi\cdots\pi$  contacts in the crystal structure of **II**. Dashed lines indicate the intermolecular interactions and the dimers are labeled along with the interaction energy obtained by DFT calculations ( $E_{tot}$  in kcal mol<sup>-1</sup>, refer Table 2 in main manuscript).

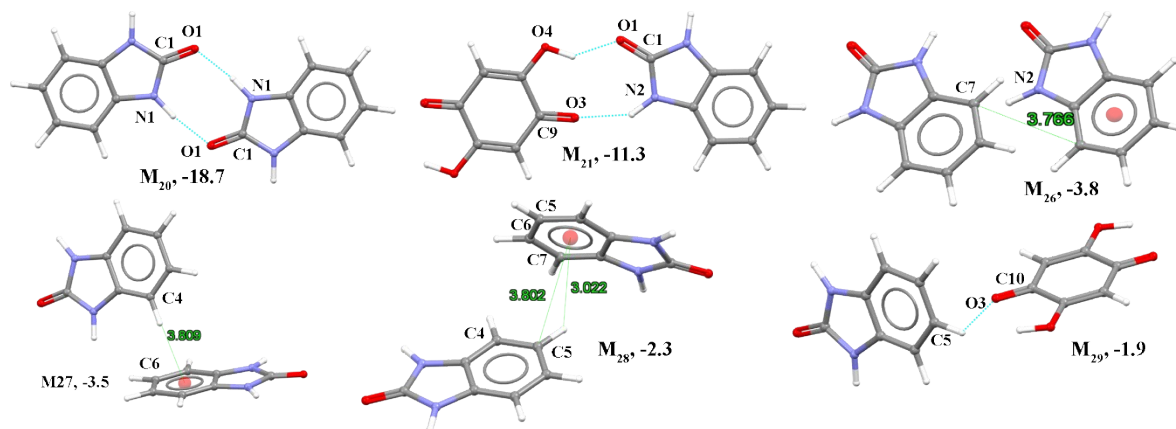

**Figure S6.** Homo- and heterodimeric motifs formed through hydrogen bonding and  $\pi\cdots\pi$  contacts in the crystal structure of **III**. Dashed lines indicate the intermolecular interactions and the dimers are labeled along with the interaction energy obtained by DFT calculations ( $E_{\text{tot}}$  in kcal mol<sup>-1</sup>, refer Table 2 in main manuscript).

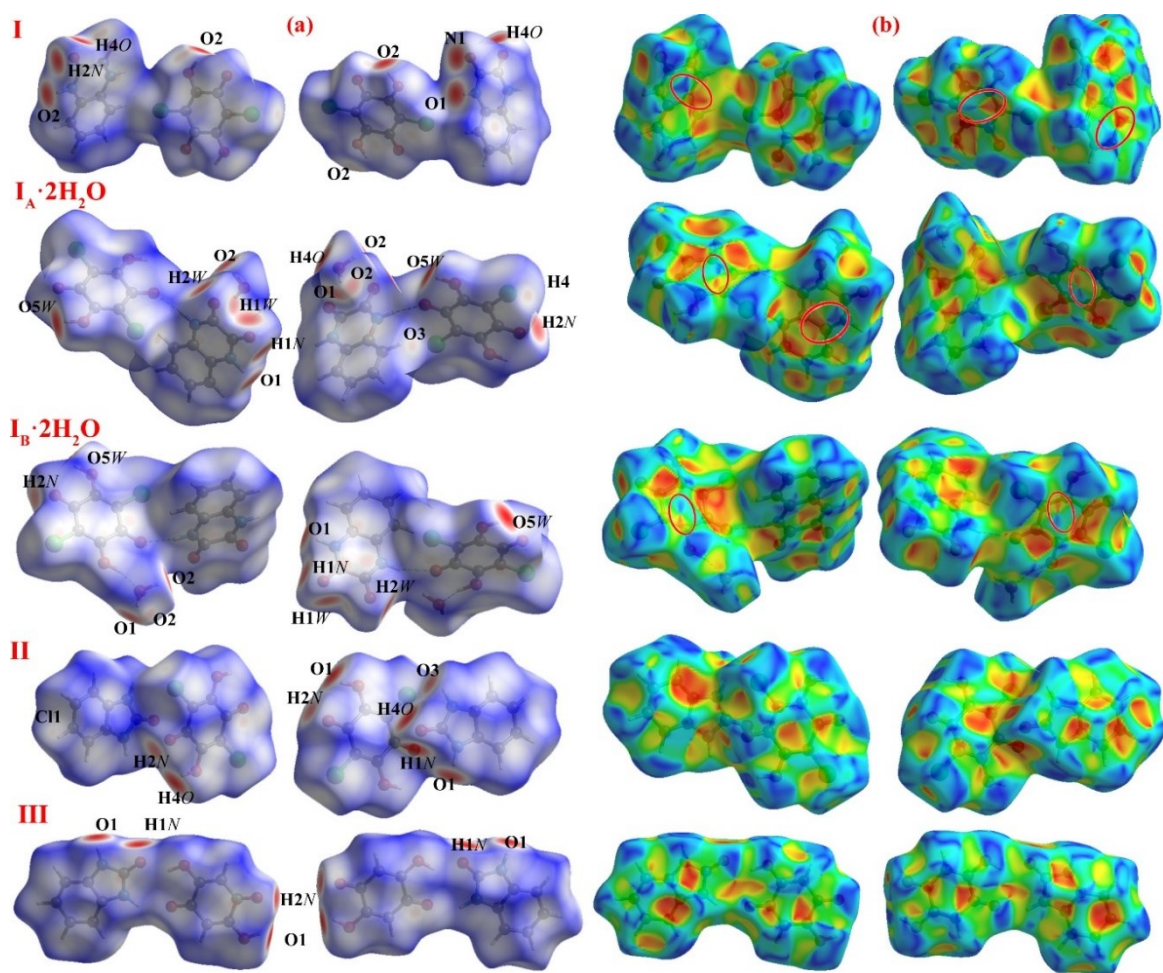

**Figure S7.** (a) Two different perspectives of the Hirshfeld surfaces mapped with  $d_{\text{norm}}$ . (b) Two different perspective views of the Hirshfeld shape index maps. Note: Red and blue triangles (circled) indicate the presence of  $\pi$ -stacking interactions in the respective compounds.

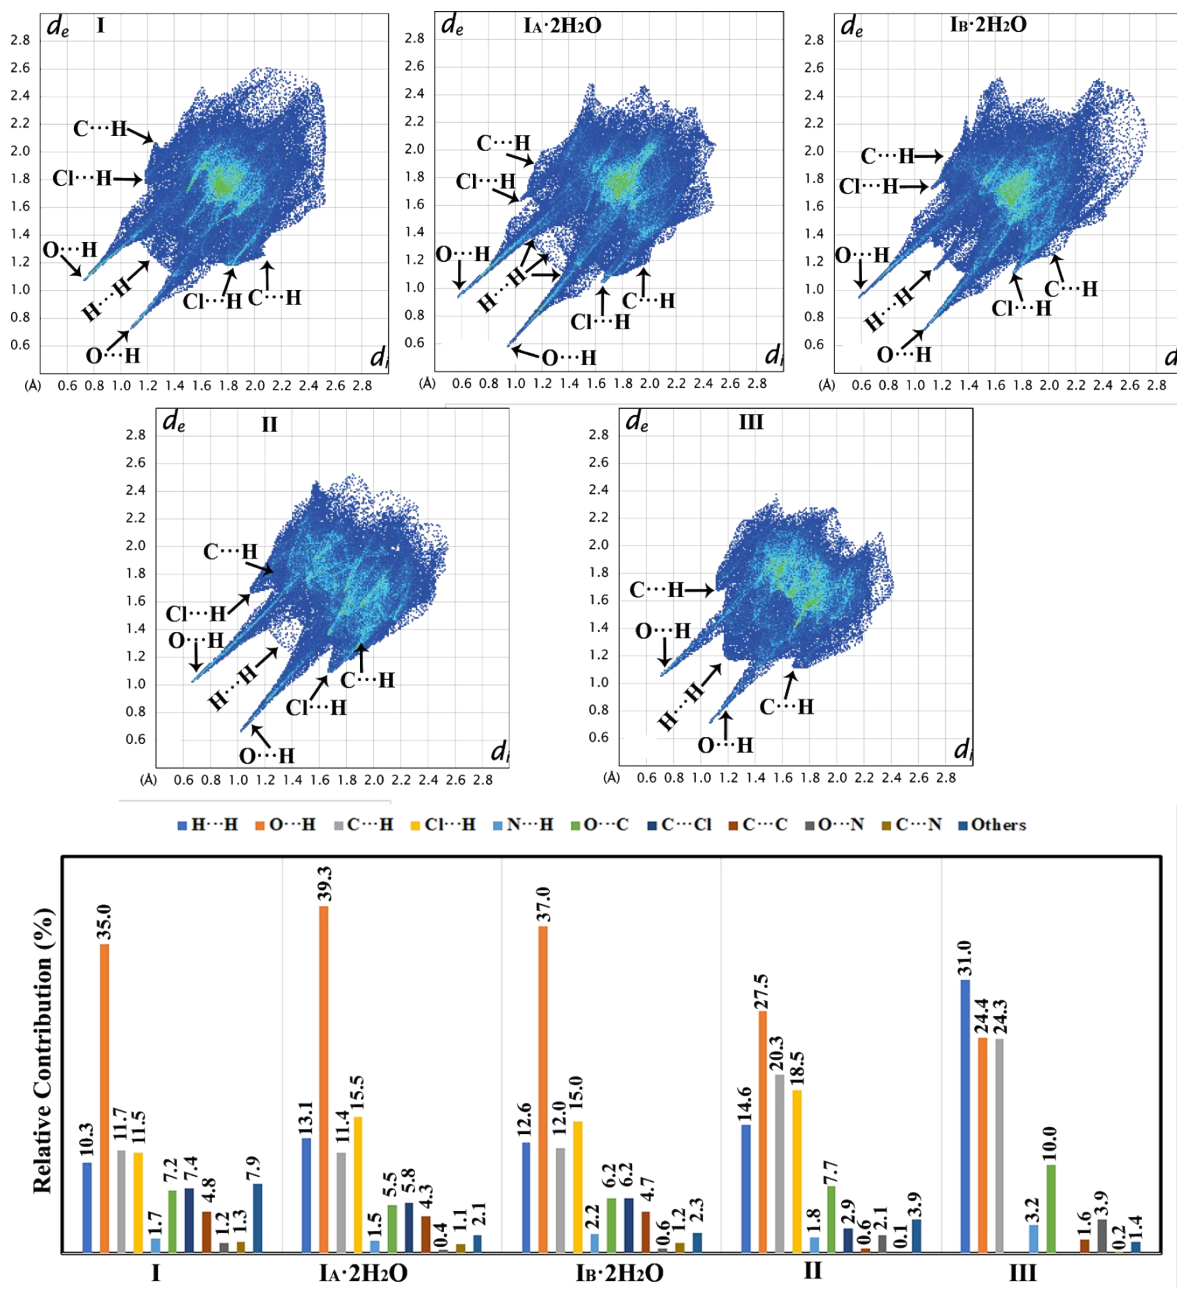

**Figure S8.** 2D Fingerprint (FP) plots for compounds I,  $I_A \cdot 2H_2O$ ,  $I_B \cdot 2H_2O$ , II and III along with the relative contributions of the various intermolecular contacts in the crystal structures.



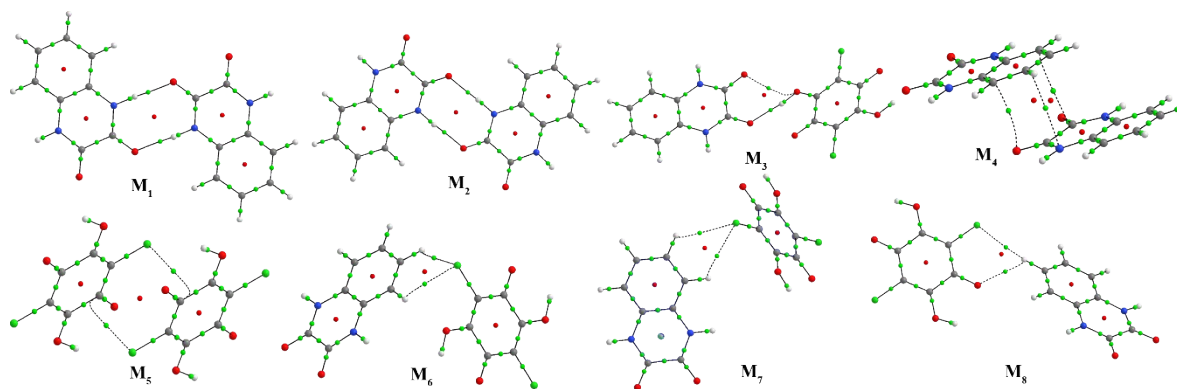

**Figure S9.** Molecular graphs with BCPs for selected molecular dimers in **I**. Small green spheres indicate the bond critical points (BCPs); and small red spheres indicate the ring critical points (RCPs).

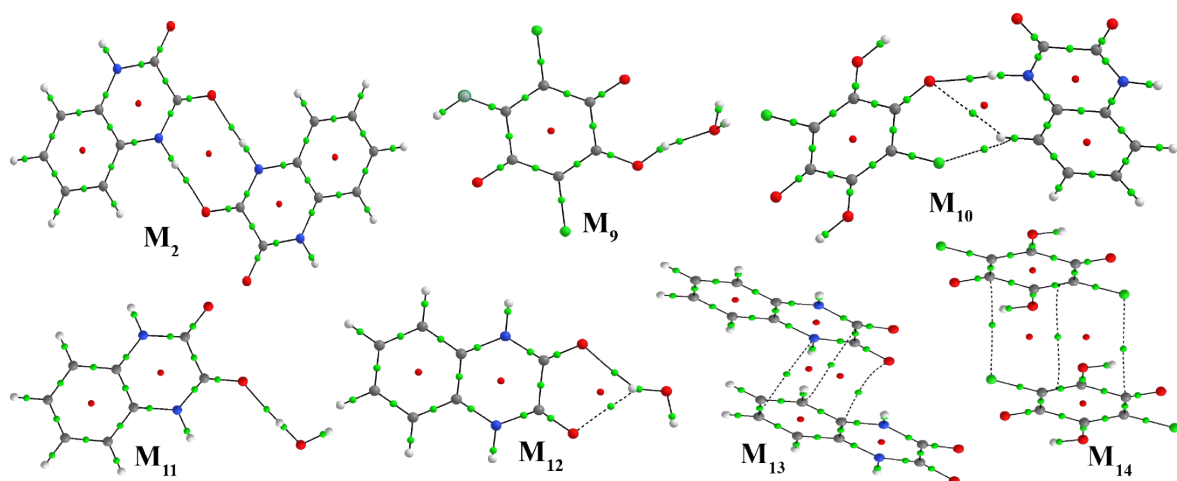

**Figure S10.** Molecular graphs with BCPs for selected molecular dimers in **I<sub>A</sub>·2H<sub>2</sub>O**. Small green spheres indicate the bond critical points (BCPs); and small red spheres indicate the ring critical points (RCPs).

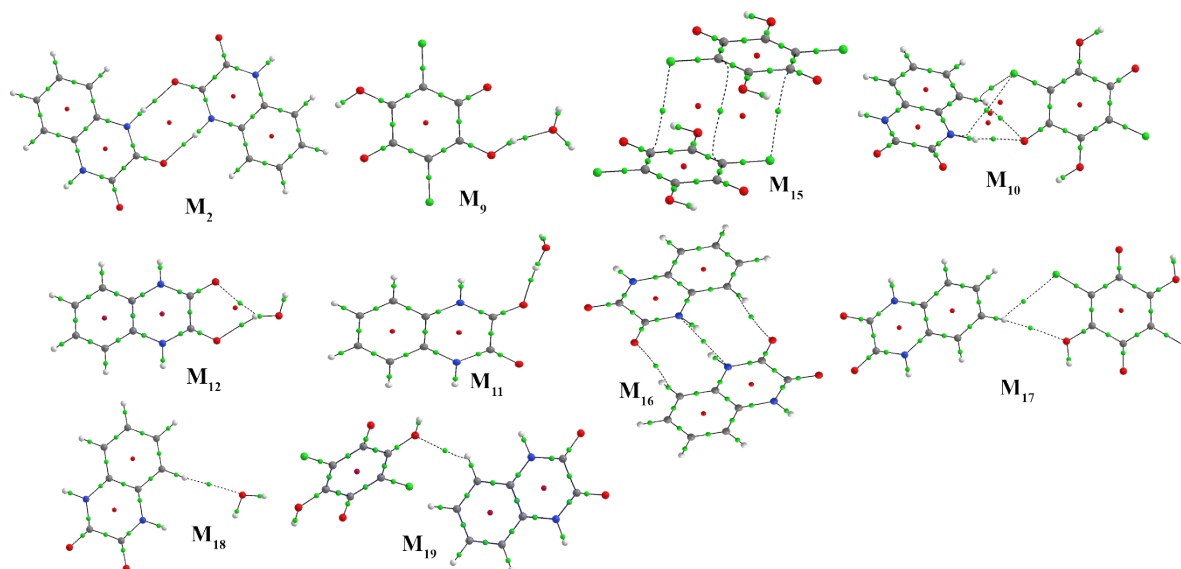

**Figure S11.** Molecular graphs with BCPs for selected molecular dimers in  $I_B \cdot 2H_2O$ . Small green spheres indicate the bond critical points (BCPs); and small red spheres indicate the ring critical points (RCPs).

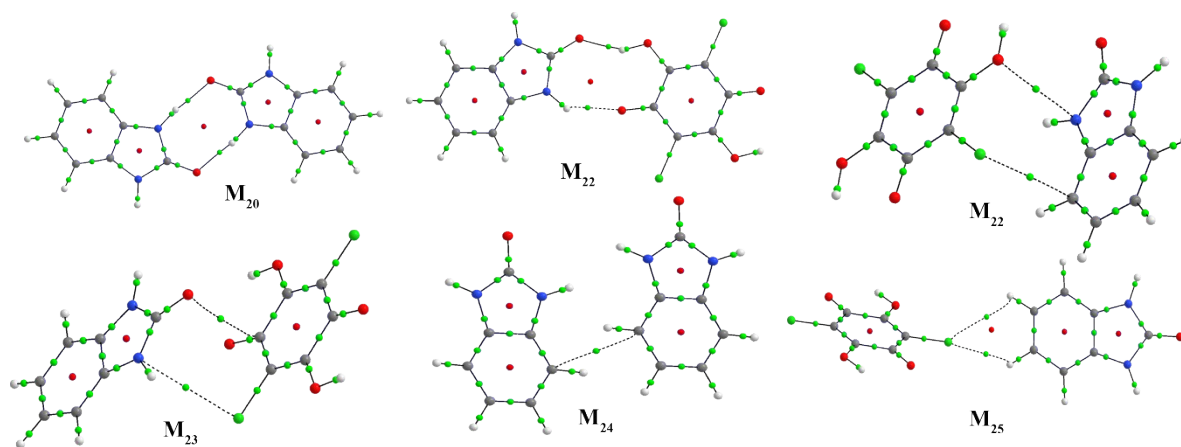

**Figure S12.** Molecular graphs with BCPs for selected molecular dimers in **II**. Small green spheres indicate the bond critical points (BCPs); and small red spheres indicate the ring critical points (RCPs).

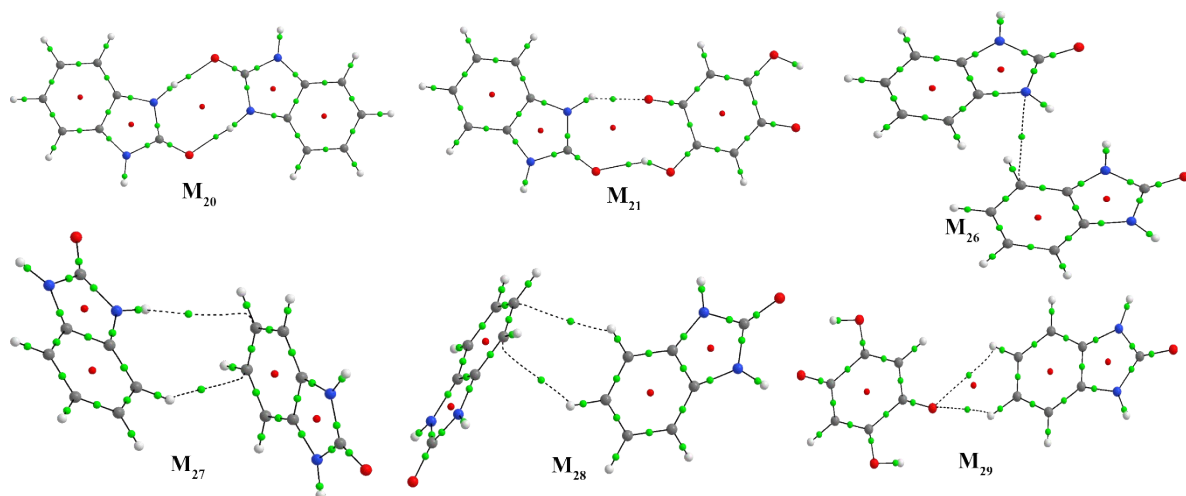

**Figure S13.** Molecular graphs with BCPs for selected molecular dimers in **III**. Small green spheres indicate the bond critical points (BCPs); and small red spheres indicate the ring critical points (RCPs).

**Table S1.** Crystallographic data and refinement parameters for compounds **I**, **I<sub>A</sub>·2H<sub>2</sub>O**, **I<sub>B</sub>·2H<sub>2</sub>O**, **II** and **III**.

|                                                                             | <b>I</b>                                                                                                                          | <b>I<sub>A</sub>·2H<sub>2</sub>O</b>                                                                                                                 | <b>I<sub>B</sub>·2H<sub>2</sub>O</b>                                                                                                                 | <b>II</b>                                                                                                           | <b>III</b>                                                                                          |
|-----------------------------------------------------------------------------|-----------------------------------------------------------------------------------------------------------------------------------|------------------------------------------------------------------------------------------------------------------------------------------------------|------------------------------------------------------------------------------------------------------------------------------------------------------|---------------------------------------------------------------------------------------------------------------------|-----------------------------------------------------------------------------------------------------|
| Deposition                                                                  | CCDC-2016348                                                                                                                      | CCDC-2016349                                                                                                                                         | CCDC-2016350                                                                                                                                         | CCDC-2016351                                                                                                        | CCDC-2016352                                                                                        |
| Formula                                                                     | C <sub>6</sub> H <sub>2</sub> Cl <sub>2</sub> O <sub>4</sub> ,<br>2(C <sub>8</sub> H <sub>6</sub> N <sub>2</sub> O <sub>2</sub> ) | C <sub>6</sub> H <sub>2</sub> Cl <sub>2</sub> O <sub>4</sub> ,<br>2(C <sub>8</sub> H <sub>6</sub> N <sub>2</sub> O <sub>2</sub> ), 2H <sub>2</sub> O | C <sub>6</sub> H <sub>2</sub> Cl <sub>2</sub> O <sub>4</sub> ,<br>2(C <sub>8</sub> H <sub>6</sub> N <sub>2</sub> O <sub>2</sub> ), 2H <sub>2</sub> O | C <sub>6</sub> H <sub>2</sub> Cl <sub>2</sub> O <sub>4</sub> ,<br>2(C <sub>7</sub> H <sub>6</sub> N <sub>2</sub> O) | C <sub>6</sub> H <sub>4</sub> O <sub>4</sub> ,<br>2(C <sub>7</sub> H <sub>6</sub> N <sub>2</sub> O) |
| fw (g mol <sup>-1</sup> )                                                   | 533.27                                                                                                                            | 569.30                                                                                                                                               | 569.30                                                                                                                                               | 477.25                                                                                                              | 408.37                                                                                              |
| Shape/color                                                                 | Plate/yellow                                                                                                                      | Irregular/red                                                                                                                                        | Needle/orange                                                                                                                                        | Prism/ orange                                                                                                       | Block/orange                                                                                        |
| Space group                                                                 | <i>P</i> -1                                                                                                                       | <i>P</i> -1                                                                                                                                          | <i>C</i> 2/ <i>c</i>                                                                                                                                 | <i>P</i> 2 <sub>1</sub> / <i>n</i>                                                                                  | <i>P</i> 2 <sub>1</sub> / <i>n</i>                                                                  |
| Crystal size/mm <sup>3</sup>                                                | 0.40 × 0.15 × 0.06                                                                                                                | 0.15 × 0.10 × 0.10                                                                                                                                   | 0.60 × 0.10 × 0.05                                                                                                                                   | 0.20 × 0.14 × 0.07                                                                                                  | 0.20 × 0.15 × 0.10                                                                                  |
| Diffractometer                                                              | Stoe-Stadivari                                                                                                                    | Stoe-Stadivari                                                                                                                                       | Stoe-Stadivari                                                                                                                                       | Stoe-Stadivari                                                                                                      | Stoe-Stadivari                                                                                      |
| Temp. (K)                                                                   | 295(1)                                                                                                                            | 295(1)                                                                                                                                               | 295(1)                                                                                                                                               | 295(1)                                                                                                              | 295(1)                                                                                              |
| Wavelength (Å)                                                              | 0.56083                                                                                                                           | 0.56083                                                                                                                                              | 0.56083                                                                                                                                              | 0.56083                                                                                                             | 0.56083                                                                                             |
| <i>a</i> (Å)                                                                | 4.7921(5)                                                                                                                         | 4.7183(6)                                                                                                                                            | 27.986(3)                                                                                                                                            | 8.4521(5)                                                                                                           | 5.2947(6)                                                                                           |
| <i>b</i> (Å)                                                                | 11.1245(12)                                                                                                                       | 10.9094(12)                                                                                                                                          | 4.6150(3)                                                                                                                                            | 5.1303(2)                                                                                                           | 8.1240(7)                                                                                           |
| <i>c</i> (Å)                                                                | 11.2988(13)                                                                                                                       | 11.9445(16)                                                                                                                                          | 24.046(2)                                                                                                                                            | 23.1482(14)                                                                                                         | 20.880(3)                                                                                           |
| <i>α</i> (°)                                                                | 65.883(8)                                                                                                                         | 74.120(9)                                                                                                                                            | 90                                                                                                                                                   | 90                                                                                                                  | 90                                                                                                  |
| <i>β</i> (°)                                                                | 86.445(9)                                                                                                                         | 81.304(11)                                                                                                                                           | 132.364(5)                                                                                                                                           | 99.316(5)                                                                                                           | 90.109(9)                                                                                           |
| <i>γ</i> (°)                                                                | 78.351(8)                                                                                                                         | 81.681(10)                                                                                                                                           | 90                                                                                                                                                   | 90                                                                                                                  | 90                                                                                                  |
| <i>V</i> (Å <sup>3</sup> )                                                  | 538.29(11)                                                                                                                        | 581.11(13)                                                                                                                                           | 2294.7(4)                                                                                                                                            | 990.51(9)                                                                                                           | 898.13(17)                                                                                          |
| <i>Z</i> , <i>Z'</i>                                                        | 1, 1/2                                                                                                                            | 1, 1/2                                                                                                                                               | 4, 1/2                                                                                                                                               | 2, 1/2                                                                                                              | 2, 1/2                                                                                              |
| <i>μ</i> (mm <sup>-1</sup> )                                                | 0.194                                                                                                                             | 0.187                                                                                                                                                | 0.189                                                                                                                                                | 0.201                                                                                                               | 0.070                                                                                               |
| <i>ρ</i> <sub>calcd</sub> (Mg/m <sup>-3</sup> )                             | 1.645                                                                                                                             | 1.627                                                                                                                                                | 1.648                                                                                                                                                | 1.600                                                                                                               | 1.510                                                                                               |
| Transm. factors                                                             | 0.654-1.000                                                                                                                       | 0.497-1.000                                                                                                                                          | 0.325-1.000                                                                                                                                          | 0.492-1.000                                                                                                         | 0.352-1.000                                                                                         |
| Refl. collected                                                             | 15290                                                                                                                             | 13338                                                                                                                                                | 25780                                                                                                                                                | 20107                                                                                                               | 19443                                                                                               |
| Senθ/λ (Å <sup>-1</sup> )                                                   | 0.68                                                                                                                              | 0.64                                                                                                                                                 | 0.64                                                                                                                                                 | 0.64                                                                                                                | 0.64                                                                                                |
| <i>R</i> <sub>int</sub>                                                     | 0.042                                                                                                                             | 0.069                                                                                                                                                | 0.109                                                                                                                                                | 0.045                                                                                                               | 0.070                                                                                               |
| Completeness                                                                | 99.9%                                                                                                                             | 99.9%                                                                                                                                                | 99.7%                                                                                                                                                | 99.6%                                                                                                               | 99.9                                                                                                |
| Data/param.                                                                 | 2879/172                                                                                                                          | 2515/190                                                                                                                                             | 2487/187                                                                                                                                             | 2160/173                                                                                                            | 1966/146                                                                                            |
| Restraints                                                                  | 0                                                                                                                                 | 0                                                                                                                                                    | 0                                                                                                                                                    | 0                                                                                                                   | 0                                                                                                   |
| <i>R</i> <sub>1</sub> , <i>wR</i> <sub>2</sub> [ <i>I</i> > 2σ( <i>I</i> )] | 0.035, 0.085                                                                                                                      | 0.034, 0.060                                                                                                                                         | 0.033, 0.058                                                                                                                                         | 0.036, 0.099                                                                                                        | 0.040, 0.094                                                                                        |
| <i>R</i> <sub>1</sub> , <i>wR</i> <sub>2</sub> [all data]                   | 0.055, 0.091                                                                                                                      | 0.076, 0.068                                                                                                                                         | 0.068, 0.063                                                                                                                                         | 0.053, 0.104                                                                                                        | 0.057, 0.102                                                                                        |
| GOF on <i>F</i> <sup>2</sup>                                                | 0.894                                                                                                                             | 0.841                                                                                                                                                | 0.741                                                                                                                                                | 1.043                                                                                                               | 0.906                                                                                               |

**Table S2.** Topological parameters from the QTAIM calculations for the intermolecular interactions observed in the molecular dimers of compound I.  $R_{ij}$ : Bond path,  $\rho$ : electron density ( $e/\text{\AA}^3$ ),  $\nabla^2\rho$ : Laplacian electron density ( $e/\text{\AA}^5$ ),  $V$ : potential energy density (a.u.);  $G$ : kinetic energy density (a.u.).  $D.E._{(int)}$ : dissociation energy =  $-V \times 0.5$  (kcal mol<sup>-1</sup>).

| Dimer                | Atoms <sup>[a]</sup> | $R_{ij}$ | $\rho$  | $\nabla^2\rho$ | Ellipticity | $V$      | $G$     | $D.E._{(int)}$ | $-V/G$ |
|----------------------|----------------------|----------|---------|----------------|-------------|----------|---------|----------------|--------|
| <b>M<sub>1</sub></b> | H2N...O2             | 1.877    | 0.21498 | 2.40310        | 0.01573     | -0.02856 | 0.02675 | 8.96           | 1.07   |
|                      | O2...H2N             | 1.876    | 0.21503 | 2.40308        | 0.01572     | -0.02857 | 0.02675 | 8.96           | 1.07   |
| <b>M<sub>2</sub></b> | O1...H1N             | 1.835    | 0.23872 | 2.54528        | 0.01411     | -0.03311 | 0.02976 | 10.39          | 1.11   |
|                      | H1N...O1             | 1.835    | 0.23872 | 2.54480        | 0.01410     | -0.03310 | 0.02975 | 10.39          | 1.11   |
| <b>M<sub>3</sub></b> | H4O...O2             | 1.906    | 0.18362 | 2.23697        | 0.01678     | -0.02365 | 0.02343 | 7.42           | 1.01   |
|                      | O4...O1              | 3.056    | 0.06611 | 0.94886        | 1.23348     | -0.00626 | 0.00805 | 1.96           | 0.78   |
| <b>M<sub>4</sub></b> | O2...C3              | 3.489    | 0.04161 | 0.50866        | 1.65211     | -0.00309 | 0.00418 | 0.97           | 0.74   |
|                      | C1...C7              | 3.353    | 0.04023 | 0.46919        | 0.28505     | -0.00280 | 0.00384 | 0.88           | 0.73   |
|                      | N2...C5              | 3.494    | 0.03718 | 0.42762        | 1.83371     | -0.00250 | 0.00347 | 0.78           | 0.72   |
| <b>M<sub>5</sub></b> | C9...CL1             | 3.763    | 0.04696 | 0.60496        | 9.27398     | -0.00351 | 0.00489 | 1.10           | 0.72   |
|                      | CL1...C9             | 3.762    | 0.04695 | 0.60488        | 9.27232     | -0.00351 | 0.00489 | 1.10           | 0.72   |
| <b>M<sub>6</sub></b> | CL1...H6             | 3.025    | 0.03909 | 0.46442        | 0.19368     | -0.00278 | 0.00380 | 0.87           | 0.73   |
|                      | CL1...H7             | 3.060    | 0.03636 | 0.43873        | 0.14273     | -0.00260 | 0.00358 | 0.82           | 0.73   |
| <b>M<sub>7</sub></b> | CL1...H6             | 3.025    | 0.03910 | 0.46444        | 0.19370     | -0.00281 | 0.00382 | 0.89           | 0.74   |
| <b>M<sub>8</sub></b> | CL1...H5             | 3.049    | 0.03300 | 0.39060        | 0.35331     | -0.00226 | 0.00316 | 0.71           | 0.72   |
|                      | O3...H5              | 2.549    | 0.05767 | 0.78046        | 0.18746     | -0.00492 | 0.00651 | 1.54           | 0.76   |

<sup>a</sup> Atom numbering is as presented in Fig. 1.

**Table S3.** Topological parameters from the QTAIM calculations for the intermolecular interactions observed in the molecular dimers of compound  $I_A \cdot 2H_2O$ .  $R_{ij}$ : Bond path,  $\rho$ : electron density ( $e/\text{\AA}^3$ ),  $\nabla^2\rho$ : Laplacian electron density ( $e/\text{\AA}^5$ ),  $V$ : potential energy density (a.u.);  $G$ : kinetic energy density (a.u.).  $D.E._{(int)}$ : dissociation energy =  $-V \times 0.5$  (kcal mol $^{-1}$ ).

| Dimer                 | Atoms <sup>[a]</sup> | $R_{ij}$ | $\rho$  | $\nabla^2\rho$ | Ellipticity | $V$      | $G$     | $D.E._{(int)}$ | $-V/G$ |
|-----------------------|----------------------|----------|---------|----------------|-------------|----------|---------|----------------|--------|
| <b>M<sub>2</sub></b>  | H1N1...O1            | 1.869    | 0.22046 | 2.41088        | 0.01736     | -0.02948 | 0.02725 | 9.25           | 1.08   |
|                       | O1...H1N1            | 1.869    | 0.22046 | 2.41088        | 0.01736     | -0.02948 | 0.02725 | 9.25           | 1.08   |
| <b>M<sub>9</sub></b>  | H4O...O5W            | 1.548    | 0.48001 | 2.80894        | 0.03222     | -0.08565 | 0.05740 | 26.87          | 1.49   |
| <b>M<sub>10</sub></b> | H2N2...O3            | 1.978    | 0.15564 | 2.18581        | 0.02224     | -0.01917 | 0.02092 | 6.02           | 0.92   |
|                       | H4...O3              | 2.687    | 0.04427 | 0.55242        | 0.25104     | -0.00360 | 0.00467 | 1.13           | 0.77   |
|                       | H4...CL1             | 3.654    | 0.02839 | 0.33573        | 0.57188     | -0.00181 | 0.00265 | 0.57           | 0.68   |
| <b>M<sub>11</sub></b> | O2...H2W             | 1.826    | 0.22414 | 2.58376        | 0.00463     | -0.03211 | 0.02946 | 10.07          | 1.09   |
| <b>M<sub>12</sub></b> | O1...H1W             | 2.000    | 0.15083 | 2.13581        | 0.06051     | -0.01815 | 0.02015 | 5.69           | 0.90   |
|                       | O2...H1W             | 2.236    | 0.09793 | 1.37033        | 0.27036     | -0.00984 | 0.01203 | 3.09           | 0.82   |
| <b>M<sub>13</sub></b> | C8...O1              | 3.742    | 0.04406 | 0.54411        | 2.39158     | -0.00332 | 0.00448 | 1.04           | 0.74   |
|                       | C4...C2              | 3.422    | 0.04126 | 0.48738        | 1.56088     | -0.00288 | 0.00397 | 0.90           | 0.73   |
|                       | C6...N1              | 3.495    | 0.04289 | 0.51495        | 2.63873     | -0.00302 | 0.00418 | 0.95           | 0.72   |
| <b>M<sub>14</sub></b> | C9...CL1             | 3.481    | 0.03785 | 0.47748        | 1.04276     | -0.00272 | 0.00384 | 0.85           | 0.71   |
|                       | C10...C10            | 4.415    | 0.03458 | 0.37901        | 8.87527     | -0.00221 | 0.00307 | 0.69           | 0.72   |
|                       | CL1...C9             | 3.481    | 0.03785 | 0.47745        | 1.04310     | -0.00272 | 0.00384 | 0.85           | 0.71   |

<sup>a</sup> Atom numbering is as presented in Fig. 1.

**Table S4.** Topological parameters from the QTAIM calculations for the intermolecular interactions observed in the molecular dimers of compound  $I_B \cdot 2H_2O$ .  $R_{ij}$ : Bond path,  $\rho$ : electron density ( $e/\text{\AA}^3$ ),  $\nabla^2\rho$ : Laplacian electron density ( $e/\text{\AA}^5$ ),  $V$ : potential energy density (a.u.);  $G$ : kinetic energy density (a.u.).  $D.E._{(int)}$ : dissociation energy =  $-V \times 0.5$  (kcal mol<sup>-1</sup>).

| Dimer                 | Atoms <sup>[a]</sup> | $R_{ij}$ | $\rho$  | $\nabla^2\rho$ | Ellipticity | $V$      | $G$     | $D.E._{(int)}$ | $-V/G$ |
|-----------------------|----------------------|----------|---------|----------------|-------------|----------|---------|----------------|--------|
| <b>M<sub>2</sub></b>  | H1N1...O1            | 1.895    | 0.20577 | 2.34984        | 0.02131     | -0.02680 | 0.02559 | 8.41           | 1.05   |
|                       | O1...H1N1            | 1.895    | 0.20581 | 2.34989        | 0.02130     | -0.02680 | 0.02559 | 8.41           | 1.05   |
| <b>M<sub>9</sub></b>  | H4O...O5W            | 1.558    | 0.46508 | 2.90048        | 0.03146     | -0.08251 | 0.05630 | 25.89          | 1.47   |
| <b>M<sub>15</sub></b> | CL1...C9             | 3.367    | 0.04792 | 0.61223        | 1.16083     | -0.00373 | 0.00504 | 1.17           | 0.74   |
|                       | C10...C10            | 4.083    | 0.04236 | 0.48442        | 8.64421     | -0.00291 | 0.00397 | 0.91           | 0.73   |
|                       | C9...CL1             | 3.367    | 0.04792 | 0.61226        | 1.15998     | -0.00373 | 0.00504 | 1.17           | 0.74   |
| <b>M<sub>10</sub></b> | H2N2...O3            | 2.116    | 0.11219 | 1.64387        | 0.01843     | -0.01208 | 0.01457 | 3.79           | 0.83   |
|                       | H4...O3              | 2.601    | 0.05087 | 0.64477        | 0.11656     | -0.00420 | 0.00545 | 1.32           | 0.77   |
|                       | H4...CL1             | 3.364    | 0.03824 | 0.45372        | 0.50046     | -0.00264 | 0.00367 | 0.83           | 0.72   |
|                       | H2...CL1             | 3.816    | 0.03510 | 0.43892        | 2.15223     | -0.00262 | 0.00359 | 0.82           | 0.73   |
| <b>M<sub>12</sub></b> | O1...H1W             | 1.927    | 0.17649 | 2.35416        | 0.02438     | -0.02277 | 0.02359 | 7.14           | 0.96   |
|                       | O2...H1W             | 2.446    | 0.06750 | 0.88538        | 1.00364     | -0.00633 | 0.00776 | 1.99           | 0.82   |
| <b>M<sub>11</sub></b> | O2...H2W             | 1.806    | 0.23982 | 2.61572        | 0.01325     | -0.03493 | 0.03103 | 10.96          | 1.13   |
| <b>M<sub>16</sub></b> | O1...C3              | 3.593    | 0.04916 | 0.61057        | 3.56585     | -0.00386 | 0.00510 | 1.21           | 0.76   |
|                       | C1...C4              | 3.718    | 0.04621 | 0.56438        | 44.75599    | -0.00333 | 0.00459 | 1.04           | 0.73   |
|                       | N1...C6              | 3.681    | 0.04668 | 0.58455        | 4.35668     | -0.00343 | 0.00475 | 1.08           | 0.72   |
| <b>M<sub>17</sub></b> | H6...CL1             | 3.024    | 0.03647 | 0.43745        | 0.03382     | -0.00255 | 0.00354 | 0.80           | 0.72   |
|                       | H6...O4              | 2.823    | 0.02854 | 0.36243        | 0.12462     | -0.00230 | 0.00303 | 0.72           | 0.76   |
| <b>M<sub>18</sub></b> | H7...O5W             | 2.739    | 0.03007 | 0.42017        | 0.08449     | -0.00244 | 0.00340 | 0.76           | 0.72   |
| <b>M<sub>19</sub></b> | H7...O4              | 2.696    | 0.05128 | 0.66923        | 0.44284     | -0.00427 | 0.00561 | 1.34           | 0.76   |

<sup>a</sup> Atom numbering is as presented in Fig. 1.

**Table S5.** Topological parameters from the QTAIM calculations for the intermolecular interactions observed in the molecular dimers of compound **II**.  $R_{ij}$ : Bond path,  $\rho$ : electron density ( $e/\text{\AA}^3$ ),  $\nabla^2\rho$ : Laplacian electron density ( $e/\text{\AA}^5$ ),  $V$ : potential energy density (a.u.);  $G$ : kinetic energy density (a.u.).  $D.E._{(int)}$ : dissociation energy =  $-V \times 0.5$  (kcal mol<sup>-1</sup>).

| Dimer                 | Atoms <sup>[a]</sup> | $R_{ij}$ | $\rho$  | $\nabla^2\rho$ | Ellipticity | $V$      | $G$     | $D.E._{(int)}$ | $-V/G$ |
|-----------------------|----------------------|----------|---------|----------------|-------------|----------|---------|----------------|--------|
| <b>M<sub>20</sub></b> | O1...H1N             | 1.838    | 0.23397 | 2.52851        | 0.02736     | -0.03208 | 0.02915 | 10.06          | 1.10   |
|                       | H1N...O1             | 1.838    | 0.23391 | 2.52863        | 0.02737     | -0.03207 | 0.02915 | 10.06          | 1.10   |
| <b>M<sub>21</sub></b> | H4O...O1             | 1.707    | 0.30592 | 2.78951        | 0.00995     | -0.04789 | 0.03842 | 15.03          | 1.25   |
|                       | O3...H2N2            | 2.112    | 0.10682 | 1.78058        | 0.11685     | -0.01149 | 0.01498 | 3.61           | 0.77   |
| <b>M<sub>22</sub></b> | CL1...C7             | 3.465    | 0.04340 | 0.49256        | 0.10753     | -0.00296 | 0.00404 | 0.93           | 0.73   |
| <b>M<sub>23</sub></b> | C9...O1              | 3.178    | 0.04646 | 0.59457        | 0.96201     | -0.00397 | 0.00507 | 1.25           | 0.78   |
|                       | CL1...N2             | 3.454    | 0.04247 | 0.51871        | 0.51014     | -0.00299 | 0.00419 | 0.94           | 0.71   |
| <b>M<sub>24</sub></b> | C4...C7              | 3.459    | 0.03611 | 0.39747        | 3.29726     | -0.00222 | 0.00317 | 0.70           | 0.70   |
| <b>M<sub>25</sub></b> | CL1...H6             | 2.804    | 0.04985 | 0.69050        | 0.17776     | -0.00411 | 0.00564 | 1.29           | 0.73   |
|                       | CL1...H5             | 3.116    | 0.03470 | 0.46393        | 0.39510     | -0.00259 | 0.00370 | 0.81           | 0.70   |

<sup>a</sup> Atom numbering is as presented in Fig. 1.

**Table S6.** Topological parameters from the QTAIM calculations for the intermolecular interactions observed in the molecular dimers of compound **III**.  $R_{ij}$ : Bond path,  $\rho$ : electron density ( $e/\text{\AA}^3$ ),  $\nabla^2\rho$ : Laplacian electron density ( $e/\text{\AA}^5$ ),  $V$ : potential energy density (a.u.);  $G$ : kinetic energy density (a.u.).  $D.E._{(int)}$ : dissociation energy =  $-V \times 0.5$  (kcal mol<sup>-1</sup>).

| Dimer                 | Atoms <sup>[a]</sup> | $R_{ij}$ | $\rho$  | $\nabla^2\rho$ | Ellipticity | $V$      | $G$     | $D.E._{(int)}$ | $-V/G$ |
|-----------------------|----------------------|----------|---------|----------------|-------------|----------|---------|----------------|--------|
| <b>M<sub>20</sub></b> | O1...H1N             | 1.821    | 0.24344 | 2.58256        | 0.02594     | -0.03396 | 0.03038 | 10.65          | 1.12   |
|                       | H1N...O1             | 1.821    | 0.24334 | 2.58282        | 0.02594     | -0.03394 | 0.03037 | 10.65          | 1.12   |
| <b>M<sub>21</sub></b> | H4O...O1             | 1.792    | 0.24802 | 2.75992        | 0.02884     | -0.03595 | 0.03229 | 11.28          | 1.11   |
|                       | O3...H2N2            | 2.016    | 0.13194 | 2.14183        | 0.09801     | -0.01563 | 0.01893 | 4.91           | 0.83   |
| <b>M<sub>26</sub></b> | C7...N2              | 3.532    | 0.03130 | 0.36104        | 0.71607     | -0.00208 | 0.00291 | 0.65           | 0.71   |
| <b>M<sub>27</sub></b> | H4...C6              | 2.888    | 0.04258 | 0.46919        | 1.20020     | -0.00293 | 0.00390 | 0.92           | 0.75   |
|                       | H2N2...C5            | 3.225    | 0.03014 | 0.36034        | 0.66945     | -0.00211 | 0.00292 | 0.66           | 0.72   |
| <b>M<sub>28</sub></b> | H4...C5              | 2.953    | 0.03724 | 0.42538        | 0.38102     | -0.00252 | 0.00347 | 0.79           | 0.73   |
|                       | H5...C4              | 3.074    | 0.03717 | 0.40718        | 1.20110     | -0.00245 | 0.00334 | 0.77           | 0.73   |
| <b>M<sub>29</sub></b> | H5...O3              | 2.587    | 0.05191 | 0.68662        | 0.11462     | -0.00435 | 0.00574 | 1.36           | 0.76   |
|                       | H6...O3              | 2.896    | 0.03412 | 0.43097        | 0.33912     | -0.00282 | 0.00364 | 0.88           | 0.77   |

<sup>a</sup> Atom numbering is as presented in Fig. 1.
